# Supplementary material
Source: PubMed Central journal article supplement (PMC6953719)
Supplement: NIHMS1052571-supplement-supplementary_figures_and_data.pdf [file NIHMS1052571-supplement-supplementary_figures_and_data.pdf]

## Supplementary Materials

Fig. S1. Phenotypic and functional analysis of DR-ER-Hoxb8 cells and their response to mTOR inhibition

Fig. S2. Raptor deletion impairs monocyte development without causing apoptosis

Fig. S3. Impaired development of myeloid progenitors in Raptor-deficient mice

Fig. S4. Myeloid-specific deletion of Raptor does not affect monocyte or neutrophil homeostasis

Fig. S5. Deletion of Tsc2 augments myelopoiesis via mTORC1 activation

Fig. S6. mTORC1 modulates myeloid development via S6K1

Fig. S7. mTORC1-S6K1 signaling modulates the expression of Myc and its target genes

Fig. S8. Complete images from gel electrophoresis

Table S1. Results from small molecule library screen using DR-ER-Hoxb8 cells

Table S2. Effects of mTOR inhibitors on monocyte marker expression in DR-ER-Hoxb8 cells

Table S3. Table of antibodies

Table S4. Compilation of raw data and analysis

Figure S1

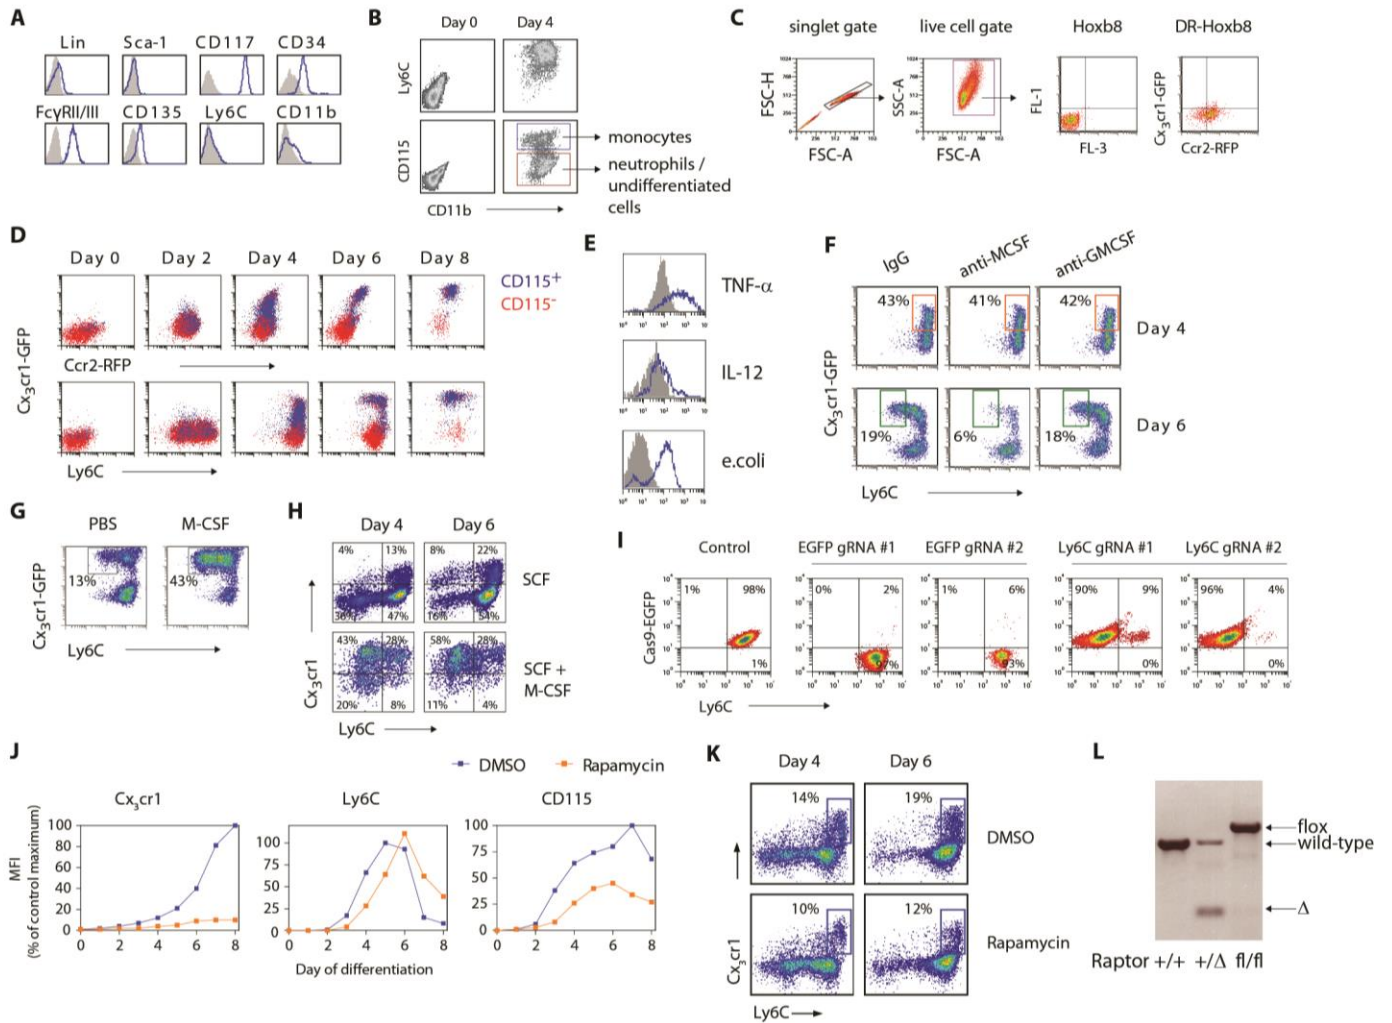

**Figure S1. Phenotypic and functional analysis of DR-ER-Hoxb8 cells and their response to mTOR inhibition.** A) Expression of myeloid progenitor markers in undifferentiated ER-Hoxb8 cells. Gray shade represents isotype control. B) FACS plot illustrating monocytes (CD115<sup>+</sup>) and granulocytes / undifferentiated cells (CD115<sup>-</sup>) derived from wild-type ER-Hoxb8 progenitors upon estrogen withdrawal. C) FACS plot of gating strategy and baseline fluorescence in DR-ER-Hoxb8 cells and wild-type ER-Hoxb8 cells prior to differentiation. D) Longitudinal analyses of Cx3cr1-GFP, CCR2-RFP and Ly6C expression in DR-ER-Hoxb8 cells during the course of differentiation. Monocytes are identified by CD115 staining (blue). E) Intracellular staining of TNF- $\alpha$  and IL-12 production (top and middle panel) 16 hours after LPS stimulation (1  $\mu$ g/mL) and FACS analysis of fluorescent *Escherichia coli* ( $1 \times 10^6$  particles per  $1 \times 10^5$  cells) uptake by Ly6C<sup>hi</sup> monocytes (lower panel). Gray shade represents untreated controls. F) FACS plots of DR-ER-Hoxb8 cells differentiated in the presence of neutralizing antibodies to M-CSF or GM-CSF (10  $\mu$ g/mL). Boxes depict Ly6C<sup>hi</sup> monocytes in the upper panels and Ly6C<sup>lo</sup> monocytes in the lower panels. G) FACS analysis of DR-ER-Hoxb8 cells

differentiated in the presence of M-CSF (20 ng/mL) or 6 days. Boxes depict the percentage of Ly6C<sup>lo</sup> monocytes. H) FACS plot of sorted bone marrow CMP (Lin<sup>-</sup> Sca-1<sup>-</sup> c-kit<sup>+</sup> CD127<sup>-</sup> FcγR II/III<sup>mid</sup> CD34<sup>+</sup>) cultured in low-dose SCF (10 ng/mL) with or without the addition of M-CSF (20 ng/mL) for 4 or 6 days. I) FACS plot of Cas9-EGFP ER-Hoxb8 cells with or without introduction of the indicated gRNA. Cells were analyzed on Day 4 of differentiation. J) Longitudinal analysis of monocyte marker expression in DR-ER-Hoxb8 cells in the presence or absence of rapamycin (500 nM). Results were normalized to the peak expression (MFI) in DMSO-treated cells. K) FACS plots of monocyte differentiation from freshly isolated bone marrow CMP in low dose SCF (10 ng/mL) with or without rapamycin (500 nM). L) Genotype confirmation of Raptor<sup>fl/fl</sup> and <sup>+/-Δ</sup> ER-Hoxb8 cells by conventional PCR and agarose gel electrophoresis.

Figure S2

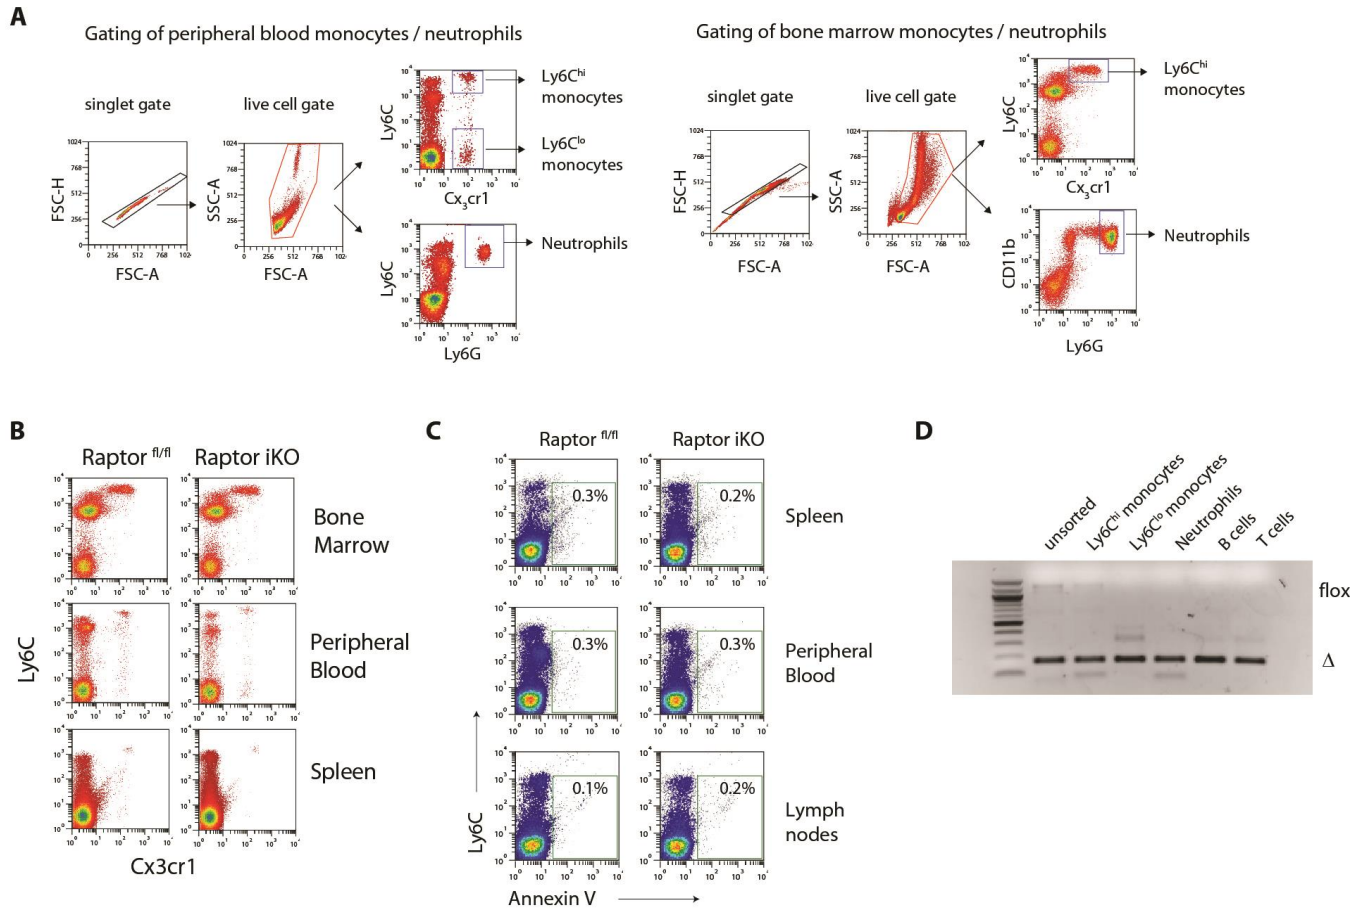

**Figure S2. Raptor deletion impairs monocyte development without causing apoptosis.** A) Gating strategy for the analysis of peripheral blood and bone marrow myeloid cells. B) FACS plot of baseline myeloid cell populations in Raptor <sup>fl/fl</sup> and iKO mice prior to tamoxifen treatment. C) FACS analysis of annexin V staining the peripheral blood, spleen, and lymph nodes from Raptor <sup>fl/fl</sup> or iKO mice two weeks after tamoxifen treatment. Box indicates percentage of annexin V positive events. D) PCR analysis of Raptor deletion in sorted bone marrow cells from Raptor iKO mice 2 weeks after tamoxifen treatment.

Figure S3

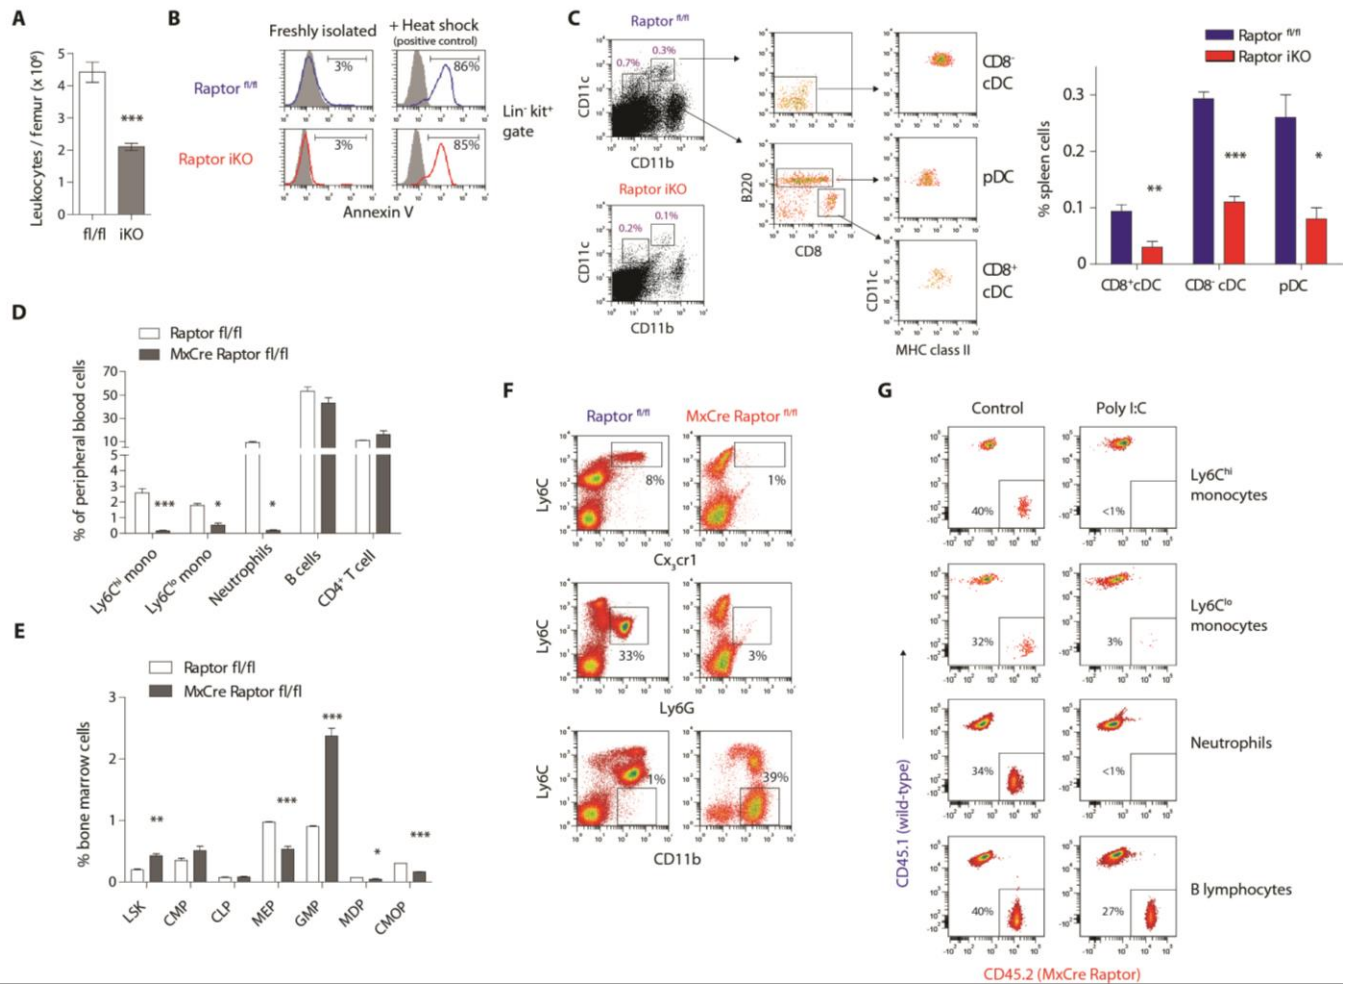

**Figure S3. Impaired development of myeloid progenitors in Raptor-deficient mice.** A) Comparison of total bone marrow cell count in Raptor<sup>fl/fl</sup> and Raptor<sup>iKO</sup> mice (n = 5 per group). B) Annexin V staining of c-kit<sup>+</sup> progenitor cells from Raptor<sup>fl/fl</sup> and Raptor<sup>iKO</sup> mice. Cells heat-shocked at 45°C for 30 min were used as positive control. C) Gating strategy and quantification of splenic DC subsets in Raptor<sup>fl/fl</sup> and Raptor<sup>iKO</sup> mice two weeks after tamoxifen treatment (n = 3 per group). D) Quantification of peripheral blood cell subsets (n = 5 per group) and E) bone marrow progenitors in Mx-Cre Raptor<sup>fl/fl</sup> mice (n = 3 per group) two weeks after poly I:C treatment. F) FACS analysis of bone marrow myeloid cells in Mx-Cre Raptor<sup>fl/fl</sup> mice and controls two weeks after poly I:C treatment. Boxes indicate Ly6C<sup>hi</sup> monocytes (upper), neutrophils (middle) and Ly6C<sup>lo</sup> monocyte / macrophages (lower panel). G) FACS plots of peripheral blood cells in CD45.1<sup>+</sup> recipient mice transplanted with bone marrow cells from CD45.1<sup>+</sup> wild-type and CD45.2<sup>+</sup> MxCre Raptor<sup>fl/fl</sup> mice. Analysis was performed two weeks after poly I:C treatment (see schematic in Fig 3E). \* p < 0.05, \*\* p < 0.01, \*\*\* p < 0.001

Figure S4

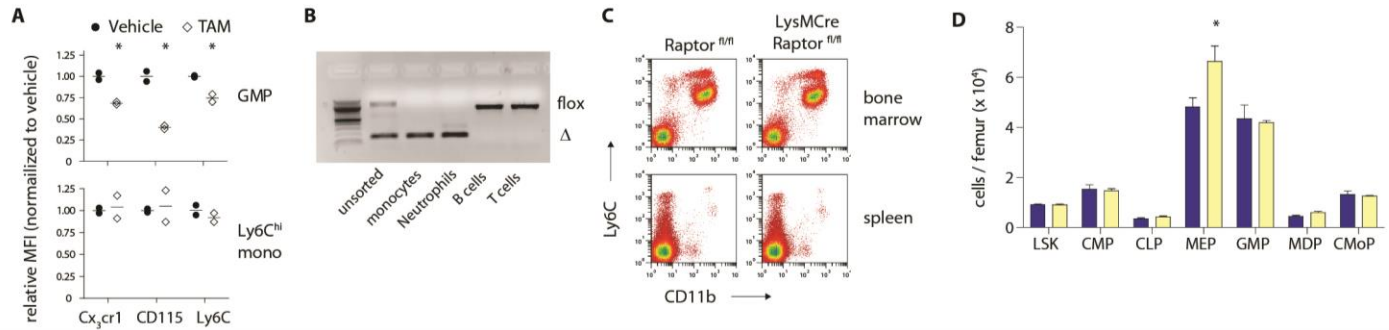

**Figure S4. Myeloid-specific deletion of Raptor does not affect monocyte or neutrophil homeostasis.** A) FACS analysis of sorted GMP and Ly6C<sup>hi</sup> monocytes from Raptor iKO mice cultured in medium containing SCF and M-CSF (10 ng/mL) ± 4OH-tamoxifen (1 μM) for 4 days. B) PCR confirmation of myeloid-specific Raptor deletion in LysMCre mice. C) FACS plots of bone marrow and spleen myeloid cells in LysMCre Raptor<sup>fl/fl</sup> and control mice. D) Quantification of bone marrow progenitors from LysMCre<sup>+/+</sup> Raptor<sup>fl/fl</sup> and control mice (n = 4 per group). Bars represent mean ± SEM. \* p < 0.05



Figure S5

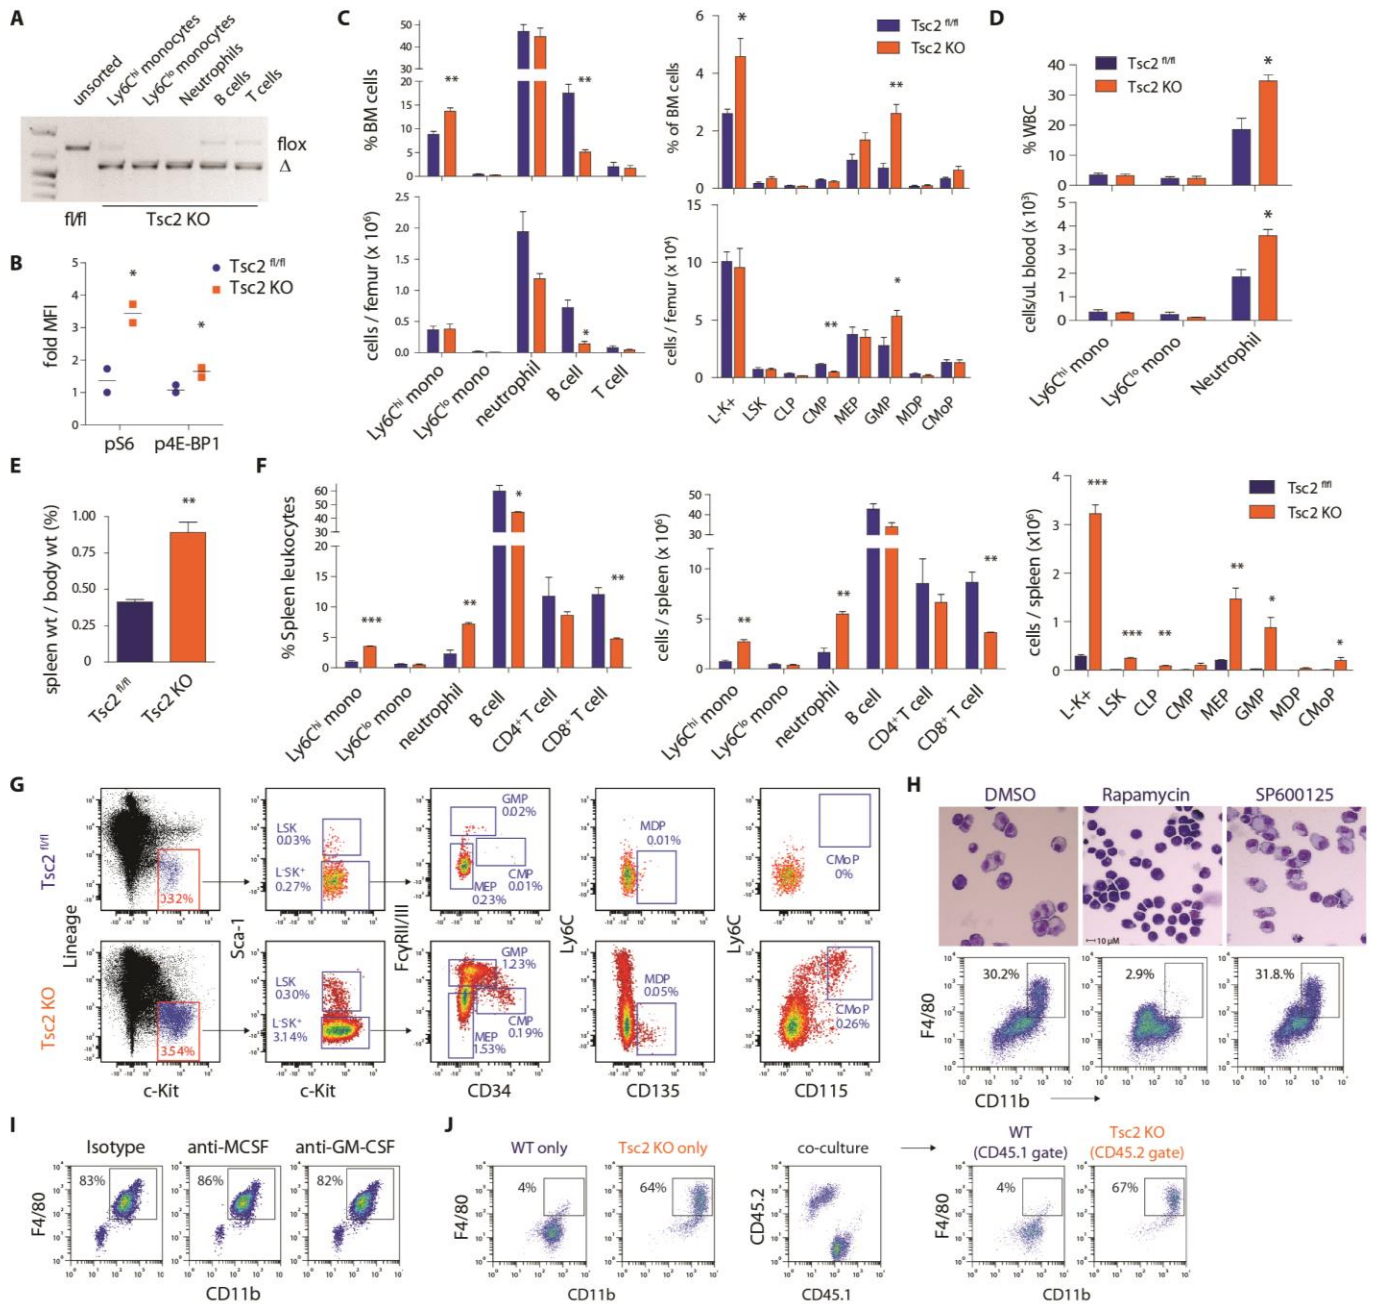

**Figure S5. Deletion of *Tsc2* augments myelopoiesis via mTORC1 activation.** A) PCR analysis of *Tsc2* deletion in sorted bone marrow cells from *Tsc2* KO after poly I:C treatment. B) Intracellular flow cytometry analysis of phospho-S6 and phospho-4E-BP1 in total bone marrow cells (n = 2 per group). C) Quantification of bone marrow cell subsets and D) peripheral blood myeloid cells in *Tsc2* KO vs. control mice (n = 3 per group). E) Measurement of spleen weight / total body weight ratio and F) quantification of spleen cell subsets in *Tsc2* KO mice and controls (n = 3 per group). G) FACS plots illustrating the gating scheme for spleen myeloid progenitor cell analysis. Boxes indicate progenitor cell subsets and percentage of total bone marrow cells. For panels B-G, animals were analyzed 4 weeks after poly I:C treatment. H) FACS plots and Giemsa-Wright

staining of cells differentiated from sorted Tsc2 KO LSK cells cultured in the presence of rapamycin (100 ng/mL) or the JNK inhibitor SP600125 (5  $\mu$ M) for 6 days. I) FACS plots of sorted Tsc2 KO LSK cells cultured in the presence of indicated antibodies for 8 days. J) FACS plots of control LSK cells (CD45.1) and Tsc2 KO LSK cells co-cultured in the presence of SCF for 8 days. Boxes in panel H-J indicate CD11b<sup>+</sup> F4/80<sup>+</sup> macrophages. Bars represent mean  $\pm$  SEM. \*  $p < 0.05$ , \*\*  $p < 0.01$ , \*\*\*  $p < 0.001$



Figure S6

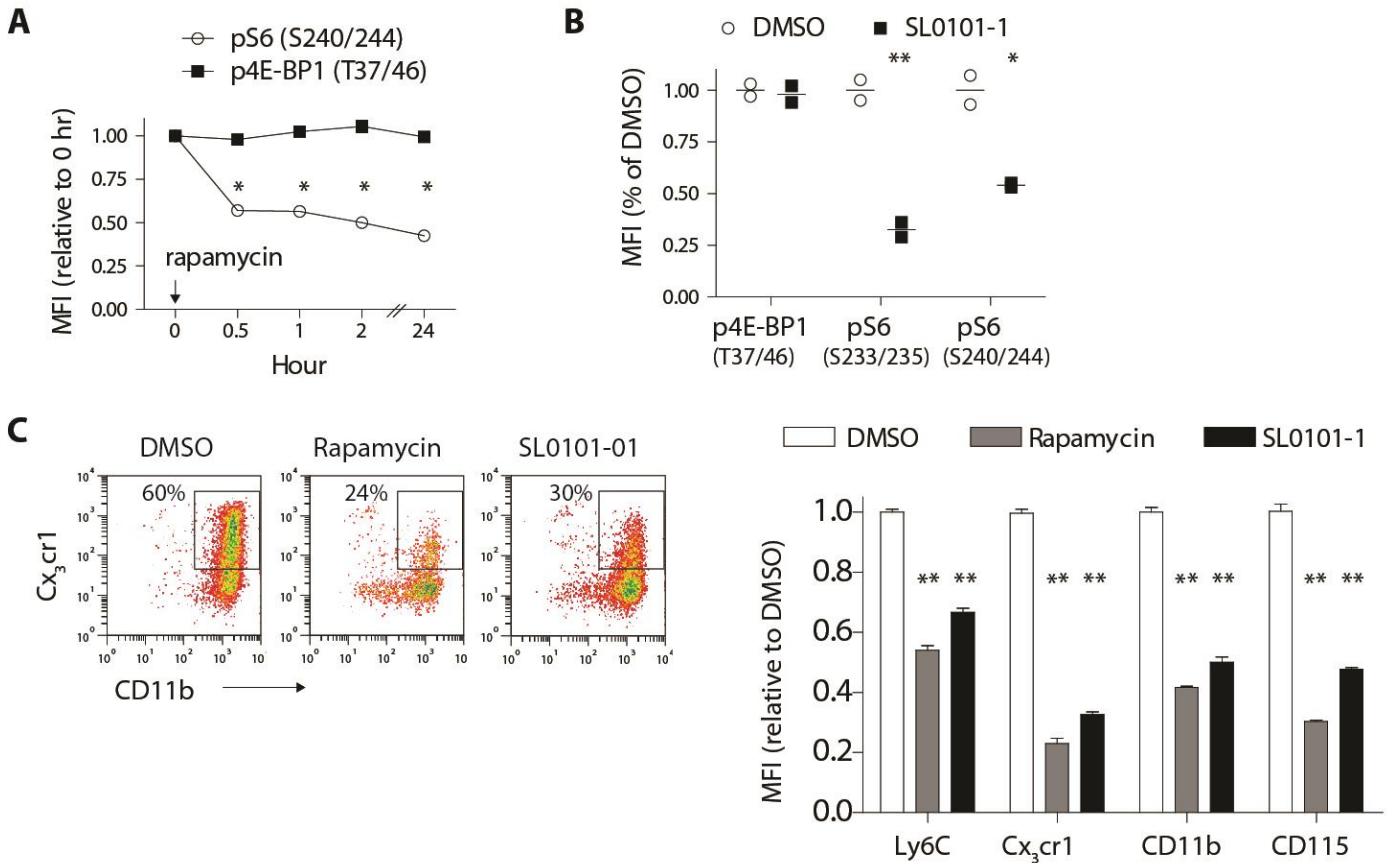

**Figure S6. mTORC1 modulates myeloid development via S6K1.** A) Longitudinal analysis of phospho-S6 and phospho-4E-BP1 staining in ER-Hoxb8 cells treated with rapamycin (100 nM). Values represent average MFI of duplicate samples normalized to pre-stimulation control (0 hr). B) Intracellular staining of phospho-S6 and phospho-4E-BP1 in ER-Hoxb8 cells treated with DMSO or SL0101-01 (10 nM) for 24 hr (n = 2 per condition). C) FACS plots and quantification of DR-ER-Hoxb8 cells differentiated in the presence of DMSO, rapamycin (100 nM) or SL0101-01 (10 nM) for 4 days. Box in FACS plots (upper panel) indicates the percentage of Ly6C<sup>hi</sup> monocytes. Bar graph depicts relative expression of monocyte markers normalized to DMSO-treated cells. Bars present mean  $\pm$  SEM of triplicate samples. \* p < 0.05, \*\* p < 0.01

Figure S7

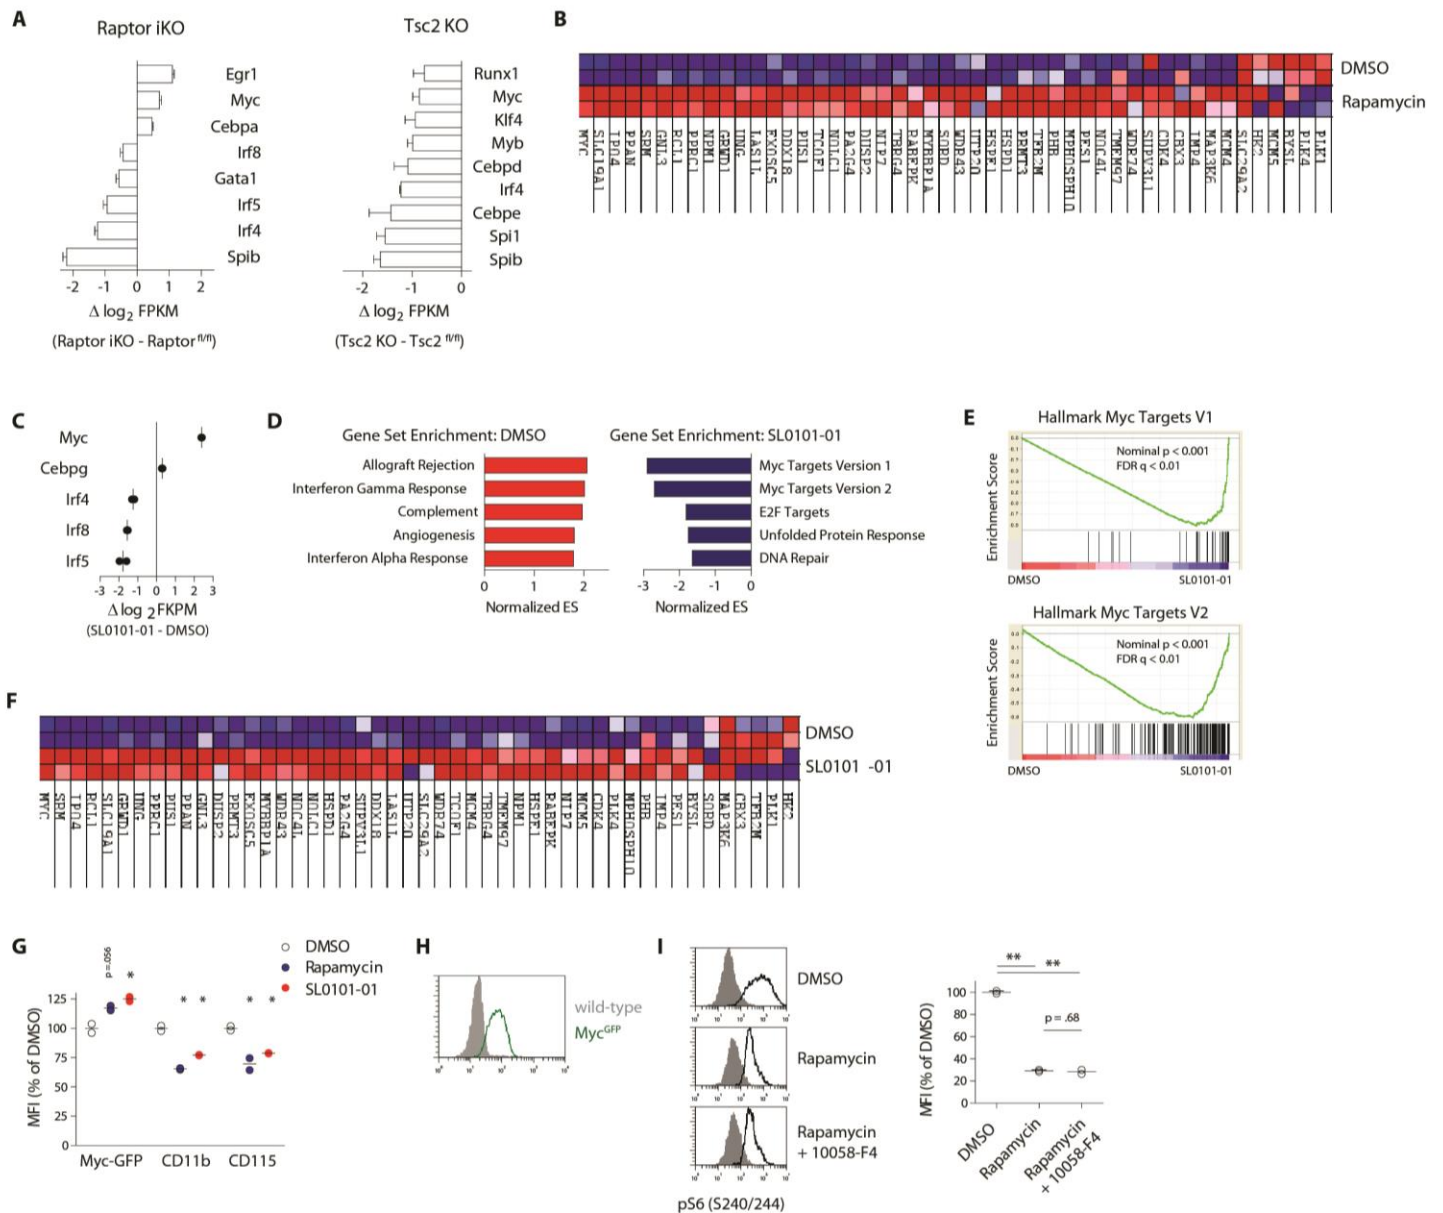

**Figure S7. mTORC1-S6K signaling modulates the expression of Myc and its target genes.** A) Bar graph display of myeloid transcription factors differentially expressed in GMPs of Raptor<sup>fl/fl</sup> vs. Raptor iKO and Tsc2<sup>fl/fl</sup> vs. Tsc2 KO mice on RNA-seq analysis (n = 3 per group). Bars represent mean  $\pm$  SEM. Positive values indicate greater expression in the KO group while negative values indicate greater expression in the control group. B) Heat map display of Myc target gene set V1 (from GSEA) in ER-Hoxb8 cells differentiated in the presence of DMSO vs. Rapamycin (100 nM) for 4 days (n = 2 per group). C-F) RNA-seq analysis of myeloid transcription factors in ER-Hoxb8 cells differentiated for 4 days in the presence of DMSO vs. SL0101-01 (10 nM). C) Display of transcription factors with significant difference between DMSO vs. SL0101-01 treatment. D) Top 5 enriched gene sets in DMSO vs. SL0101-01-treated ER-Hoxb8 cells based on normalized enrichment score (NES) from GSEA. E) Enrichment plot of Myc target gene sets from GSEA. F) Heat map display of Myc

target gene set V1 (from GSEA) in ER-Hoxb8 cells differentiated in the presence of DMSO vs. SL0101-01 for 4 days (n = 2 per condition). G) Quantification of GFP and myeloid marker expression in sorted CMP from Myc<sup>GFP</sup> mice cultured in the presence of DMSO, rapamycin (100 nM) or SL0101-01 (10 nM) for 3 days (n = 2 per condition). J) FACS analysis of baseline GFP expression in wild-type and Myc<sup>GFP</sup> ER-Hoxb8 cells. I) Histogram and quantification of intracellular pS6 staining in ER-Hoxb8 cells differentiated in the presence of DMSO, rapamycin (100 nM) or rapamycin + 10058-F5 (50 nM) for 4 days (n = 2 per condition). \* p < 0.05, \*\* p < 0.01

Figure S8

**A** Raptor iKO (Fig S2D)

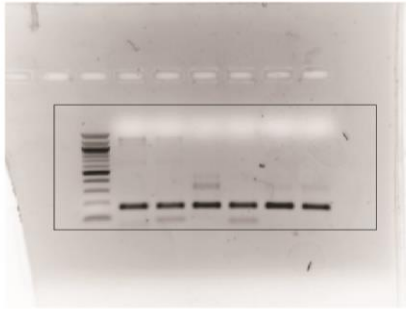

**B** LysMCre Raptor<sup>fl/m</sup> (Fig S4B)

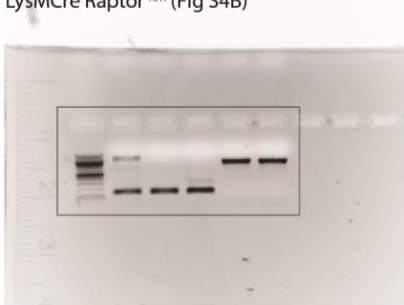

**C** TSC2 KO (Fig S5A)

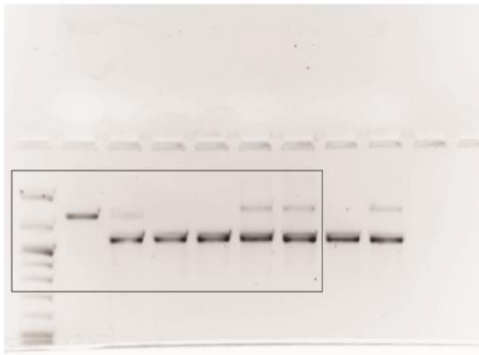

Figure S8. Unmodified images from gel electrophoresis. Boxes indicate the area cropped for figure display.

Table S1. Results from small molecule library screen using DR-ER-Hoxb8 cells \*

| Plate | Well    | Compound                       | Optimized Concentration | Ly6C MFI                                | Cx3cr1 MFI | CD115 MFI | Ccr2 MFI |
|-------|---------|--------------------------------|-------------------------|-----------------------------------------|------------|-----------|----------|
|       | Control | DMSO                           | 0.10%                   | 100%                                    | 100%       | 100%      | 100%     |
| 1     | A2      | TG003                          | 10 $\mu$ M              | 35%                                     | 29%        | 35%       | 66%      |
| 1     | A3      | AG-879                         | 10 $\mu$ M              | 128%                                    | 46%        | 50%       | 108%     |
| 1     | A4      | Chelerythrine chloride         | 1 $\mu$ M               | 117%                                    | 119%       | 108%      | 110%     |
| 1     | A5      | Canertinib (hydrochloride)     | 1 $\mu$ M               | 147%                                    | 61%        | 82%       | 78%      |
| 1     | A6      | CHIR99021                      | 10 $\mu$ M              | 36%                                     | 17%        | 4%        | 19%      |
| 1     | A7      | Bisindolylmaleimide IV         | 1 $\mu$ M               | 148%                                    | 62%        | 74%       | 98%      |
| 1     | A8      | NU 6102                        | 10 $\mu$ M              | 95%                                     | 31%        | 49%       | 87%      |
| 1     | A9      | SU 6656                        | 1 $\mu$ M               | 106%                                    | 142%       | 83%       | 100%     |
| 1     | A10     | ABT-869                        | 1 $\mu$ M               | 86%                                     | 79%        | 52%       | 87%      |
| 1     | A11     | U-0126                         | 10 $\mu$ M              | 105%                                    | 116%       | 67%       | 196%     |
| 1     | B2      | PKC 412                        | 10 $\mu$ M              | 146%                                    | 113%       | 109%      | 94%      |
| 1     | B3      | 1-NA-PP1                       | 1 $\mu$ M               | 106%                                    | 82%        | 105%      | 90%      |
| 1     | B4      | Tunicamycin                    | 10 mM                   | 116%                                    | 86%        | 88%       | 98%      |
| 1     | B5      | SB 431542                      | 10 $\mu$ M              | 91%                                     | 37%        | 85%       | 63%      |
| 1     | B6      | BIO                            | 1 $\mu$ M               | 109%                                    | 77%        | 85%       | 77%      |
| 1     | B7      | Ro 31-6045                     | 10 $\mu$ M              | 72%                                     | 68%        | 101%      | 323%     |
| 1     | B8      | KN-62                          | 10 $\mu$ M              | 147%                                    | 36%        | 78%       | 59%      |
| 1     | B9      | LY364947                       | 10 $\mu$ M              | 81%                                     | 62%        | 92%       | 111%     |
| 1     | B10     | CAY10622                       | 10 $\mu$ M              | 106%                                    | 60%        | 77%       | 87%      |
| 1     | B11     | Staurosporine                  | 1 $\mu$ M               | 21%                                     | 25%        | 24%       | 40%      |
| 1     | C2      | Doramapimod                    | 1 $\mu$ M               | 43%                                     | 48%        | 66%       | 83%      |
| 1     | C3      | Torin 1                        | 100 nM                  | 46%                                     | 12%        | 17%       | 66%      |
| 1     | C4      | AZD 7762                       | 1 $\mu$ M               | 119%                                    | 121%       | 76%       | 104%     |
| 1     | C5      | PD 173074                      | 1 $\mu$ M               | 91%                                     | 36%        | 87%       | 86%      |
| 1     | C6      | Imatinib (mesylate)            | 1 $\mu$ M               | 85%                                     | 42%        | 57%       | 69%      |
| 1     | C7      | NSC 663284                     | 1 $\mu$ M               | 120%                                    | 43%        | 83%       | 79%      |
| 1     | C8      | KN-93                          | 1 $\mu$ M               | 112%                                    | 60%        | 100%      | 74%      |
| 1     | C9      | SB 203580 (hydrochloride)      | 10 $\mu$ M              | 32%                                     | 15%        | 60%       | 50%      |
| 1     | C10     | 17 $\beta$ -hydroxy Wortmannin | 1 $\mu$ M               | 92%                                     | 30%        | 50%       | 117%     |
| 1     | C11     | KN-92 (hydrochloride)          | 10 $\mu$ M              | 67%                                     | 58%        | 83%       | 75%      |
| 1     | D2      | Paclitaxel                     | 1 $\mu$ M               | 131%                                    | 133%       | 125%      | 110%     |
| 1     | D3      | Bisindolylmaleimide II         | 1 $\mu$ M               | 77%                                     | 27%        | 55%       | 188%     |
| 1     | D4      | GSK 1059615                    | 1 $\mu$ M               | 34%                                     | 22%        | 53%       | 85%      |
| 1     | D5      | Valproic Acid (sodium salt)    | 10 $\mu$ M              | 107%                                    | 47%        | 107%      | 73%      |
| 1     | D6      | Sunitinib Malate               | -                       | cell death at all tested concentrations |            |           |          |
| 1     | D7      | D 4476                         | 10 $\mu$ M              | 74%                                     | 37%        | 90%       | 76%      |
| 1     | D8      | CGP 57380                      | 10 $\mu$ M              | 61%                                     | 13%        | 43%       | 55%      |
| 1     | D9      | CAY10621                       | 1 $\mu$ M               | 81%                                     | 65%        | 104%      | 112%     |
| 1     | D10     | CAY10626                       | 100 nM                  | 48%                                     | 25%        | 51%       | 71%      |
| 1     | D11     | AS-605240 (potassium salt)     | 10 $\mu$ M              | 24%                                     | 25%        | 65%       | 72%      |
| 1     | E2      | Erlotinib                      | 1 $\mu$ M               | 43%                                     | 71%        | 58%       | 71%      |
| 1     | E3      | BIBF 1120                      | 1 $\mu$ M               | 51%                                     | 86%        | 61%       | 74%      |
| 1     | E4      | Ruxolitinib                    | 10 $\mu$ M              | 52%                                     | 21%        | 31%       | 51%      |
| 1     | E5      | PD 0325901                     | 1 $\mu$ M               | 60%                                     | 50%        | 58%       | 81%      |
| 1     | E6      | Gefitinib                      | 1 $\mu$ M               | 90%                                     | 39%        | 68%       | 69%      |
| 1     | E7      | NU 7026                        | 10 $\mu$ M              | 55%                                     | 18%        | 37%       | 78%      |
| 1     | E8      | Iso-Olomoucine                 | 10 $\mu$ M              | 111%                                    | 65%        | 94%       | 81%      |
| 1     | E9      | YM-201636                      | 1 $\mu$ M               | 68%                                     | 24%        | 35%       | 96%      |
| 1     | E10     | SU 6668                        | 10 $\mu$ M              | 104%                                    | 69%        | 86%       | 99%      |

\* Results are expressed as percentage of mean fluorescence intensity relative to DMSO control

| Plate | Well | Compound                          | Optimized Concentration | Ly6C MFI | Cx3cr1 MFI | CD115 MFI | Ccr2 MFI |
|-------|------|-----------------------------------|-------------------------|----------|------------|-----------|----------|
| 1     | E11  | PD 166326                         | 1 $\mu$ M               | 88%      | 88%        | 70%       | 128%     |
| 1     | F2   | Necrostatin-5                     | 1 $\mu$ M               | 104%     | 90%        | 110%      | 101%     |
| 1     | F3   | SMI-4a                            | 10 $\mu$ M              | 129%     | 53%        | 106%      | 83%      |
| 1     | F4   | Necrostatin-1                     | 10 $\mu$ M              | 113%     | 51%        | 92%       | 82%      |
| 1     | F5   | SB 203580                         | 10 $\mu$ M              | 44%      | 13%        | 36%       | 49%      |
| 1     | F6   | PP2                               | 1 $\mu$ M               | 102%     | 102%       | 112%      | 115%     |
| 1     | F7   | Gö 6983                           | 1 $\mu$ M               | 85%      | 23%        | 39%       | 229%     |
| 1     | F8   | (S)-Glycyl-H-1152 (hydrochloride) | 1 $\mu$ M               | 114%     | 66%        | 93%       | 98%      |
| 1     | F9   | ZM 447439                         | 1 $\mu$ M               | 124%     | 149%       | 156%      | 137%     |
| 1     | F10  | CAY10572                          | 1 $\mu$ M               | 122%     | 39%        | 60%       | 145%     |
| 1     | F11  | O-1918                            | 10 $\mu$ M              | 108%     | 75%        | 125%      | 100%     |
| 1     | G2   | NVP-BEZ235                        | 10 $\mu$ M              | 28%      | 20%        | 26%       | 59%      |
| 1     | G3   | CAY10657                          | 1 $\mu$ M               | 113%     | 55%        | 67%       | 90%      |
| 1     | G4   | SB 505124                         | 10 $\mu$ M              | 68%      | 78%        | 79%       | 52%      |
| 1     | G5   | VX-702                            | 10 $\mu$ M              | 27%      | 51%        | 57%       | 61%      |
| 1     | G6   | 3-Methyladenine                   | 10 $\mu$ M              | 84%      | 61%        | 81%       | 82%      |
| 1     | G7   | H-9 (hydrochloride)               | 10 $\mu$ M              | 88%      | 55%        | 78%       | 87%      |
| 1     | G8   | Ro 31-7549 (acetate)              | 1 $\mu$ M               | 76%      | 28%        | 41%       | 89%      |
| 1     | G9   | AS-041164                         | 10 $\mu$ M              | 98%      | 65%        | 85%       | 88%      |
| 1     | G10  | N,N-Dimethylsphingosine           | 1 $\mu$ M               | 79%      | 71%        | 91%       | 104%     |
| 1     | G11  | Y-27632 (hydrochloride)           | 10 $\mu$ M              | 57%      | 72%        | 59%       | 113%     |
| 1     | H2   | Phthalazinone pyrazole            | 1 $\mu$ M               | 86%      | 37%        | 46%       | 62%      |
| 1     | H3   | AS-703026                         | 10 $\mu$ M              | 110%     | 102%       | 81%       | 79%      |
| 1     | H4   | INK128                            | 100 nM                  | 31%      | 11%        | 22%       | 53%      |
| 1     | H5   | Emodin                            | 10 $\mu$ M              | 150%     | 46%        | 72%       | 106%     |
| 1     | H6   | Bisindolylmaleimide I             | 1 $\mu$ M               | 105%     | 38%        | 49%       | 165%     |
| 1     | H7   | Indirubin-3'-monoxime             | 1 $\mu$ M               | 109%     | 60%        | 63%       | 89%      |
| 1     | H8   | ST638                             | 10 $\mu$ M              | 99%      | 37%        | 51%       | 67%      |
| 1     | H9   | PP242                             | 1 $\mu$ M               | 41%      | 21%        | 28%       | 69%      |
| 1     | H10  | LY294002                          | 10 $\mu$ M              | 20%      | 13%        | 18%       | 36%      |
| 1     | H11  | Leelamine                         | 1 $\mu$ M               | 85%      | 91%        | 81%       | 111%     |
| 2     | A2   | PD 98059                          | 10 $\mu$ M              | 86%      | 142%       | 70%       | 124%     |
| 2     | A3   | Leelamine (hydrochloride)         | 1 $\mu$ M               | 91%      | 128%       | 112%      | 118%     |
| 2     | A4   | SC-1                              | 10 $\mu$ M              | 22%      | 14%        | 24%       | 64%      |
| 2     | A5   | Triciribine                       | 100 nM                  | 64%      | 35%        | 34%       | 83%      |
| 2     | A6   | SB 415286                         | 10 $\mu$ M              | 83%      | 49%        | 72%       | 58%      |
| 2     | A7   | DRB                               | 10 $\mu$ M              | 40%      | 19%        | 38%       | 68%      |
| 2     | A8   | Lavendustin C                     | 10 $\mu$ M              | 120%     | 58%        | 71%       | 107%     |
| 2     | A9   | H-89                              | 1 $\mu$ M               | 89%      | 73%        | 55%       | 70%      |
| 2     | A10  | CAY10576                          | 10 $\mu$ M              | 88%      | 67%        | 97%       | 77%      |
| 2     | A11  | Myricetin                         | 10 $\mu$ M              | 110%     | 85%        | 77%       | 86%      |
| 2     | B2   | PD 169316                         | 1 $\mu$ M               | 12%      | 16%        | 41%       | 71%      |
| 2     | B3   | Arachidonic Acid Leelamide        | 10 $\mu$ M              | 76%      | 87%        | 91%       | 134%     |
| 2     | B4   | (R)-Roscovitine                   | 1 $\mu$ M               | 150%     | 100%       | 98%       | 88%      |
| 2     | B5   | Erbstatin Analog                  | 1 $\mu$ M               | 84%      | 94%        | 79%       | 106%     |
| 2     | B6   | AG-17                             | 1 $\mu$ M               | 90%      | 63%        | 64%       | 139%     |
| 2     | B7   | RG-13022                          | 10 $\mu$ M              | 87%      | 51%        | 47%       | 140%     |
| 2     | B8   | SP 600125                         | 1 $\mu$ M               | 55%      | 65%        | 58%       | 87%      |
| 2     | B8   | ZM 336372                         | 1 $\mu$ M               | 79%      | 80%        | 81%       | 103%     |
| 2     | B9   | HA-1077 (hydrochloride)           | 10 $\mu$ M              | 77%      | 57%        | 40%       | 161%     |



| Plate | Well | Compound                        | Optimized Concentration | Ly6C MFI | Cx3cr1 MFI | CD115 MFI | Ccr2 MFI |
|-------|------|---------------------------------|-------------------------|----------|------------|-----------|----------|
| 2     | B10  | NH125                           | 1 $\mu$ M               | 70%      | 91%        | 100%      | 72%      |
| 2     | B11  | Rapamycin                       | 100 nM                  | 48%      | 46%        | 66%       | 100%     |
| 2     | C2   | TGX-221                         | 10 $\mu$ M              | 42%      | 37%        | 37%       | 75%      |
| 2     | C3   | Lauric Acid Leelamide           | 10 $\mu$ M              | 102%     | 36%        | 59%       | 93%      |
| 2     | C4   | BAY-43-9006                     | 10 $\mu$ M              | 99%      | 61%        | 59%       | 102%     |
| 2     | C5   | Kenpaullone                     | 1 $\mu$ M               | 48%      | 35%        | 32%       | 69%      |
| 2     | C6   | H-8 (hydrochloride)             | 10 $\mu$ M              | 160%     | 55%        | 69%       | 107%     |
| 2     | C7   | RG-14620                        | 1 $\mu$ M               | 137%     | 115%       | 109%      | 101%     |
| 2     | C8   | 5-Iodotubercidin                | 1 $\mu$ M               | 90%      | 22%        | 17%       | 59%      |
| 2     | C9   | AG-370                          | 10 $\mu$ M              | 132%     | 86%        | 79%       | 93%      |
| 2     | C10  | TWS119                          | 10 $\mu$ M              | 69%      | 37%        | 49%       | 102%     |
| 2     | D2   | (S)-H-1152 (hydrochloride)      | 1 $\mu$ M               | 105%     | 73%        | 70%       | 121%     |
| 2     | D3   | AS-252424                       | 10 $\mu$ M              | 39%      | 34%        | 81%       | 72%      |
| 2     | D4   | CAY10561                        | 1 $\mu$ M               | 88%      | 139%       | 90%       | 111%     |
| 2     | D5   | Olomoucine                      | 10 $\mu$ M              | 72%      | 168%       | 110%      | 124%     |
| 2     | D6   | LFM-A13                         | 10 $\mu$ M              | 95%      | 113%       | 95%       | 108%     |
| 2     | D7   | AG-490                          | 1 $\mu$ M               | 78%      | 68%        | 47%       | 74%      |
| 2     | D8   | SB 202190                       | 10 $\mu$ M              | 10%      | 14%        | 25%       | 42%      |
| 2     | D9   | Wortmannin                      | 1 $\mu$ M               | 73%      | 43%        | 49%       | 95%      |
| 2     | D10  | NSC 210902                      | 10 $\mu$ M              | 111%     | 89%        | 86%       | 104%     |
| 2     | E2   | AS-605240                       | 10 $\mu$ M              | 33%      | 21%        | 41%       | 63%      |
| 2     | E3   | CAY10505                        | 10 $\mu$ M              | 73%      | 86%        | 93%       | 59%      |
| 2     | E4   | AS-604850                       | 10 $\mu$ M              | 5%       | 74%        | 91%       | 68%      |
| 2     | E5   | AG-494                          | 1 $\mu$ M               | 92%      | 74%        | 63%       | 122%     |
| 2     | E6   | SC-514                          | 10 $\mu$ M              | 59%      | 66%        | 65%       | 103%     |
| 2     | E7   | AG-82                           | 10 $\mu$ M              | 72%      | 85%        | 69%       | 125%     |
| 2     | E8   | CAY10571                        | 10 $\mu$ M              | 25%      | 19%        | 62%       | 47%      |
| 2     | E9   | AG-1296                         | 1 $\mu$ M               | 114%     | 115%       | 93%       | 114%     |
| 2     | E10  | CAY10577                        | 10 $\mu$ M              | 106%     | 82%        | 92%       | 109%     |
| 2     | F2   | D-erythro-Sphingosine C-18      | 1 $\mu$ M               | 131%     | 91%        | 106%      | 70%      |
| 2     | F3   | PI-103                          | 100 nM                  | 124%     | 67%        | 92%       | 79%      |
| 2     | F4   | PI3-Kinase $\alpha$ Inhibitor 2 | 1 $\mu$ M               | 31%      | 17%        | 35%       | 87%      |
| 2     | F5   | AG-825                          | 10 $\mu$ M              | 85%      | 70%        | 68%       | 112%     |
| 2     | F6   | Apigenin                        | 10 $\mu$ M              | 68%      | 56%        | 68%       | 122%     |
| 2     | F7   | AG-99                           | 10 $\mu$ M              | 27%      | 68%        | 29%       | 220%     |
| 2     | F8   | Nilotinib                       | 10 $\mu$ M              | 97%      | 61%        | 82%       | 104%     |
| 2     | F9   | Janex 1                         | 10 $\mu$ M              | 50%      | 29%        | 56%       | 106%     |
| 2     | F10  | CAY10578                        | 10 $\mu$ M              | 96%      | 93%        | 77%       | 101%     |
| 2     | G2   | OSU03012                        | 1 $\mu$ M               | 121%     | 71%        | 106%      | 69%      |
| 2     | G3   | Sphingosine Kinase Inhibitor 2  | 1 $\mu$ M               | 92%      | 104%       | 76%       | 103%     |
| 2     | G4   | CAY10567                        | 10 $\mu$ M              | 97%      | 53%        | 99%       | 62%      |
| 2     | G5   | AG-1478                         | 1 $\mu$ M               | 67%      | 71%        | 73%       | 108%     |
| 2     | G6   | AG-18                           | 10 $\mu$ M              | 40%      | 55%        | 41%       | 157%     |
| 2     | G7   | AG-213                          | 10 $\mu$ M              | 42%      | 59%        | 46%       | 165%     |
| 2     | G9   | CAY10574                        | 10 $\mu$ M              | 37%      | 29%        | 50%       | 25%      |
| 2     | G10  | PD 184161                       | 1 $\mu$ M               | 91%      | 123%       | 110%      | 99%      |
| 2     | H2   | JNJ-10198409                    | 100 nM                  | 101%     | 93%        | 92%       | 109%     |
| 2     | H3   | Piceatannol                     | 10 $\mu$ M              | 109%     | 82%        | 118%      | 101%     |
| 2     | H4   | ML-9                            | 1 $\mu$ M               | 71%      | 90%        | 84%       | 107%     |
| 2     | H5   | SB 216763                       | 10 $\mu$ M              | 38%      | 169%       | 110%      | 113%     |
| 2     | H6   | CAY10554                        | 10 $\mu$ M              | 40%      | 69%        | 65%       | 93%      |
| 2     | H7   | AG-183                          | 10 $\mu$ M              | 62%      | 105%       | 87%       | 137%     |
| 2     | H8   | L-threo-Sphingosine C-18        | 10 $\mu$ M              | 100%     | 84%        | 80%       | 88%      |
| 2     | H9   | CAY10575                        | 10 $\mu$ M              | 106%     | 54%        | 85%       | 65%      |
| 2     | H10  | CCT018159                       | 10 $\mu$ M              | 106%     | 79%        | 100%      | 76%      |

Table S2. Effects of mTOR inhibitors on the expression of monocyte markers in DR-ER-Hoxb8 cells \*.

| Compound       | Concentration | Ly6C | CX <sub>3</sub> CR1-GFP | CD115 | CCR2-RFP |
|----------------|---------------|------|-------------------------|-------|----------|
| DMSO (Control) | -             | 100% | 100%                    | 100%  | 100%     |
| CAY10626       | 100 nM        | 48%  | 25%                     | 51%   | 71%      |
| INK128         | 100 nM        | 31%  | 11%                     | 22%   | 53%      |
| NVP-BEZ235     | 1 $\mu$ M     | 28%  | 20%                     | 26%   | 59%      |
| PP242          | 1 $\mu$ M     | 41%  | 21%                     | 28%   | 69%      |
| Rapamycin      | 100 nM        | 48%  | 46%                     | 66%   | 100%     |
| Torin 1        | 100 nM        | 46%  | 12%                     | 17%   | 66%      |

\* Results are expressed as percentage of mean fluorescence intensity relative to DMSO control

Table S3. List of antibodies and sources

| <b><u>Target antigen</u></b> | <b><u>Clone</u></b> | <b><u>Source</u></b> |
|------------------------------|---------------------|----------------------|
| B220                         | RA3-6B2             | Biolegend            |
| CD117                        | 2B8                 | Biolegend            |
| CD11a                        | M17/4               | Biolegend            |
| CD11b                        | M170                | Biolegend            |
| CD11c                        | N418                | Biolegend            |
| CD127                        | A7R34               | Biolegend            |
| CD135                        | A2F10               | Biolegend            |
| CD34                         | HM34                | Biolegend            |
| CD45.1                       | A20                 | Biolegend            |
| CD45.2                       | 104                 | Biolegend            |
| CD64                         | X54-5/7.1           | Biolegend            |
| CX3CR1                       | SA011F11            | Biolegend            |
| Ia/Ie                        | M5/114.15.2         | Biolegend            |
| Lineage Cocktail             | multiple            | Biolegend            |
| Ly6C                         | HK1.4               | Biolegend            |
| Ly6G                         | 1A8                 | Biolegend            |
| Isotype controls             | Various             | Biolegend            |
| F4/80                        | BM8                 | Ebioscience          |
| IL12                         | C17.8               | Ebioscience          |
| TNF alpha                    | MP6-XT22            | Ebioscience          |
| CD16/32                      | 2.4G2               | BD                   |
| phospho-4EBP1 (T37/46)       | 236B4               | CST                  |
| phospho-S6K1 (T389)          | 108D2               | CST                  |
| phospho-S6 (S240/244)        | D68F8               | CST                  |
| phospho-Akt (S473)           | D9E                 | CST                  |
| MCSF                         | 5A1                 | Bio X Cell           |
| GM-CSF                       | MP1-22E9            | Bio X Cell           |

\* Source of antibodies include Biolegend (San Diego, CA), BD Biosciences (San Jose, CA), Ebioscience (San Diego, CA), Cell Signaling Technology (CST; Danvers, MA) and Bio X Cell (West Lebanon, NH).
